# Supplementary material
Source: Springer Nature journal article supplement (https://www.springermedizin.de/resource/supplementary/12936_2009_911_MOESM1_ESM.pdf/9548522)
Supplement: MOESM1 [file 9548522]

Assessed for eligibility  
n=56

**Enrollment**  
n = 45

Excluded (n= 11)

Not meeting inclusion criteria (n= 6)

Refused to participate (n= 0)

Eligible but enrollees sufficient (n= 5)

**Allocation**

15 received first dose of  
15 microgram MSP3

15 received first dose of  
30 microgram MSP3

15 received first dose of  
Engerix B

15 received second dose of  
15 microgram MSP3

15 received second dose of  
30 microgram MSP3

15 received second dose of  
Engerix B

15 received third dose of  
15 microgram MSP3

15 received third dose of  
30 microgram MSP3

15 received third dose of  
Engerix B
